# Supplementary material for: Bioinformatical Design and Performance Evaluation of a Nucleocapsid- and an RBD-Based Particle Enhanced Turbidimetric Immunoassay (PETIA) to Quantify the Wild Type and Variants of Concern-Derived Immunoreactivity of SARS-CoV-2
Source: MDPI journal article supplement (doi:10.3390/biomedicines11010160), 2023-01-08
Supplement: s1 [file s1]

Supplementary data, Wey *et al.*

**Supplementary Table S1.** UniProt entry numbers of primary sequences of the Nucleocapsid protein, Spike protein, and the Spike-RBD protein of SARS-CoV-2 and the other human infecting coronaviruses (SARS-CoV, MERS-CoV, HCoV-OC43, HCoV-HKU1, HCoV-NL63, and HCoV-229E). \*HCoV-NL63 and HCoV-229E primary sequences involved in interaction with host ANPEP were chosen to compare with SARS-CoV-2's S-RBD.

| Virus     | SARS-CoV-2            |                       |                                                    |
|-----------|-----------------------|-----------------------|----------------------------------------------------|
|           | N protein<br>(P0DTC9) | S protein<br>(P0DTC2) | S-RBD<br>(P0DTC2, aa 319–541)                      |
| SARS-CoV  | P59595                | P59594                | P59594, aa 306–527                                 |
| MERS-CoV  | R9UM87                | W6A028                | W6A028, aa 394–586                                 |
| HCoV-OC43 | P33469                | P36334                | P36334, aa 318–624                                 |
| HCoV-HKU1 | Q5MQC6                | Q5MQD0                | Q5MQD0, aa 310–624                                 |
| HCoV-NL63 | Q6Q1R8                | Q6Q1S2                | Q6Q1S2, aa 598–728<br>*Interaction with host ANPEP |
| HCoV-229E | P15130                | P15423                | P15423, aa 417–547<br>*Interaction with host ANPEP |

**Supplementary Table S2.** S-RBD antigen concentration of the respective variants (wild type, *Alpha*, *Beta*, *Gamma*, *Kappa*, *Delta*, *Omicron*) in the reaction [ng] and related quantified anti-SARS-CoV-2 concentration [BAU/mL] after quenching.

| Antigen<br>concentration [ng]          | wild type | <i>Alpha</i> | <i>Beta</i> | <i>Gamma</i> | <i>Kappa</i> | <i>Delta</i> | <i>Omicron</i> |
|----------------------------------------|-----------|--------------|-------------|--------------|--------------|--------------|----------------|
| anti-SARS-CoV-2 concentration [BAU/mL] |           |              |             |              |              |              |                |
| 100.00                                 | 0.61      | 0.74         | 0.45        | 0.42         | 0.58         | 0.34         | 3.11           |
| 80.00                                  | 0.83      | 0.60         | 0.44        | 0.55         | 0.55         | 0.26         | 3.40           |
| 60.00                                  | 1.47      | 0.79         | 0.66        | 0.80         | 0.91         | 1.22         | 3.51           |
| 40.00                                  | 1.36      | 0.92         | 1.27        | 1.03         | 1.30         | 1.14         | 4.60           |
| 20.00                                  | 2.86      | 2.27         | 1.87        | 1.52         | 2.50         | 2.18         | 5.65           |
| 10.00                                  | 4.52      | 3.74         | 3.10        | 3.12         | 3.67         | 3.70         | 9.14           |
| 5.00                                   | 9.33      | 7.69         | 7.20        | 7.42         | 7.28         | 7.55         | 17.71          |
| 2.50                                   | 15.18     | 12.89        | 11.67       | 12.16        | 12.52        | 12.44        | 21.95          |
| 0.00                                   | 26.86     | 26.86        | 26.86       | 26.86        | 26.86        | 26.86        | 26.86          |

**Supplementary Table S3.** S-RBD antigen concentration of the respective variants (wild type, *Alpha*, *Beta*, *Gamma*, *Kappa*, *Delta*, *Omicron*) in the reaction [ng] and resulting recovery [%] related to a non-quenched blank sample (anti-SARS-CoV-2 concentration after quenching with 0 ng antigen refers to 100% recovery).

| Antigen<br>concentration [ng] | wild type | <i>Alpha</i> | <i>Beta</i> | <i>Gamma</i> | <i>Kappa</i> | <i>Delta</i> | <i>Omicron</i> |
|-------------------------------|-----------|--------------|-------------|--------------|--------------|--------------|----------------|
| recovery [%]                  |           |              |             |              |              |              |                |
| 100.00                        | 2.3       | 2.8          | 1.7         | 1.6          | 2.2          | 1.3          | 11.6           |
| 80.00                         | 3.1       | 2.2          | 1.7         | 2.1          | 2.0          | 1.0          | 12.7           |
| 60.00                         | 5.5       | 2.9          | 2.4         | 3.0          | 3.4          | 4.6          | 13.1           |
| 40.00                         | 5.1       | 3.4          | 4.7         | 3.8          | 4.9          | 4.3          | 17.1           |
| 20.00                         | 10.7      | 8.5          | 6.9         | 5.7          | 9.3          | 8.1          | 21.0           |
| 10.00                         | 16.8      | 13.9         | 11.5        | 11.6         | 13.7         | 13.8         | 34.0           |
| 5.00                          | 34.7      | 28.6         | 26.8        | 27.6         | 27.1         | 28.1         | 65.9           |
| 2.50                          | 56.5      | 48.0         | 43.4        | 45.3         | 46.6         | 46.3         | 81.7           |
| 0                             | 100.0     | 100.0        | 100.0       | 100.0        | 100.0        | 100.0        | 100.0          |

**Supplementary Table S4.** S-RBD antigen concentration of the *Omicron* variant in the reaction [ng] and resulting SARS-CoV-2 concentration [BAU/mL] and recovery [%] related to a non-quenched blank sample (anti-SARS-CoV-2 concentration after quenching with 0 ng antigen (26.86 BAU/mL) refers to 100% recovery).

| Antigen<br>concentration [ng] | <i>Omicron</i>                            |              |
|-------------------------------|-------------------------------------------|--------------|
|                               | anti-SARS-CoV-2 concentration<br>[BAU/mL] | recovery [%] |
| 1000.00                       | 1.55                                      | 5.8          |
| 500.00                        | 1.04                                      | 3.9          |

## Supplementary data, Wey *et al.*

**Supplementary Table S5.** (a) Diagnostic table (2x2) and (b) calculated sensitivity and specificity of the S-RBD-based PETIA. Results generated with MedCalc Statistical Software version 18.10.2 (MedCalc Software bvba, Ostend, Belgium; <http://www.medcalc.org>; 2018, accessed on 29 November 2021).

| (a)           |                 |                |    | (b)                       |         |                    |
|---------------|-----------------|----------------|----|---------------------------|---------|--------------------|
| S-RBD         |                 |                |    | Sensitivity               | 93.023% | 80.939% to 98.537% |
|               | Disease Present | Disease Absent |    | Specificity               | 98.077% | 89.745% to 99.951% |
| Test Positive | 40              | 1              | 41 | AUC                       | 0.956   | 0.892 to 0.987     |
| Test Negative | 3               | 51             | 54 | Positive Likelihood Ratio | 48.372  | 6.932 to 337.549   |
|               | 43              | 52             |    | Negative Likelihood Ratio | 0.071   | 0.024 to 0.212     |
|               |                 |                |    | Disease prevalence        | 45.263% | 35.021% to 55.809% |
|               |                 |                |    | Positive Predictive Value | 97.561% | 85.146% to 99.643% |
|               |                 |                |    | Negative Predictive Value | 94.444% | 85.083% to 98.065% |
|               |                 |                |    | Accuracy                  | 95.789% | 89.569% to 98.841% |

**Supplementary Table S6.** (a) Diagnostic table (2x2) and (b) calculated sensitivity and specificity of the N protein-based PETIA. Results generated with MedCalc Statistical Software version 18.10.2 (MedCalc Software bvba, Ostend, Belgium; <http://www.medcalc.org>; 2018, accessed on 29 November 2021).

| (a)           |                 |                |    | (b)                       |          |                     |
|---------------|-----------------|----------------|----|---------------------------|----------|---------------------|
| N protein     |                 |                |    | Sensitivity               | 100.000% | 91.779% to 100.000% |
|               | Disease Present | Disease Absent |    | Specificity               | 21.154%  | 11.061% to 34.704%  |
| Test Positive | 43              | 41             | 84 | AUC                       | 0.606    | 0.500 to 0.705      |
| Test Negative | 0               | 11             | 11 | Positive Likelihood Ratio | 1.268    | 1.102 to 1.460      |
|               | 43              | 52             |    | Negative Likelihood Ratio | 0.000    |                     |
|               |                 |                |    | Disease prevalence        | 45.263%  | 35.021% to 55.809%  |
|               |                 |                |    | Positive Predictive Value | 51.190%  | 47.673% to 54.696%  |
|               |                 |                |    | Negative Predictive Value | 100.000% |                     |
|               |                 |                |    | Accuracy                  | 56.842%  | 46.277% to 66.969%  |

## Supplementary data, Wey *et al.*

**Supplementary Table S7.** Values of the negative and positive COVID-19 samples, analyzed by the N-based Roche Elecsys® Anti-SARS-CoV-2 CLIA, the S-RBD- and N-based PETIA. Samples indicated with < LOQ (Limit of Quantitation), were considered as 0.

| Positive samples                    |                            |                                | Negative samples                    |                            |                                |
|-------------------------------------|----------------------------|--------------------------------|-------------------------------------|----------------------------|--------------------------------|
| Elecsys® Anti-SARS-CoV-2 test [Col] | S-RBD based PETIA [BAU/mL] | N protein-based PETIA [BAU/mL] | Elecsys® Anti-SARS-CoV-2 test [Col] | S-RBD based PETIA [BAU/mL] | N protein based PETIA [BAU/mL] |
| 43.30                               | 99.75                      | 109.74                         | < LOQ                               | < LOQ                      | < LOQ                          |
| 58.40                               | 84.51                      | 136.23                         | < LOQ                               | 4.86                       | 7.19                           |
| 67.10                               | 69.72                      | 133.86                         | < LOQ                               | < LOQ                      | < LOQ                          |
| 42.20                               | 95.19                      | 135.69                         | < LOQ                               | 5.58                       | 20.07                          |
| 13.90                               | 75.72                      | 50.07                          | < LOQ                               | < LOQ                      | 5.73                           |
| 110.00                              | 87.87                      | 168.75                         | < LOQ                               | < LOQ                      | < LOQ                          |
| 6.22                                | 10.05                      | 32.55                          | < LOQ                               | 4.26                       | 6.82                           |
| 8.55                                | 6.03                       | 81.78                          | < LOQ                               | < LOQ                      | < LOQ                          |
| 89.10                               | 92.10                      | 164.46                         | < LOQ                               | < LOQ                      | < LOQ                          |
| 101.00                              | 30.87                      | 168.27                         | < LOQ                               | < LOQ                      | 11.15                          |
| 8.60                                | 6.78                       | 39.27                          | < LOQ                               | < LOQ                      | < LOQ                          |
| 81.90                               | 101.25                     | 148.77                         | < LOQ                               | < LOQ                      | 24.21                          |
| 18.60                               | 59.49                      | 90.51                          | < LOQ                               | < LOQ                      | 7.85                           |
| 15.00                               | 40.41                      | 61.14                          | < LOQ                               | < LOQ                      | < LOQ                          |
| 97.90                               | 106.02                     | 172.71                         | < LOQ                               | < LOQ                      | < LOQ                          |
| 30.90                               | 93.57                      | 97.05                          | < LOQ                               | < LOQ                      | 42.07                          |
| 97.80                               | 89.61                      | 154.23                         | < LOQ                               | < LOQ                      | 43.57                          |
| 103.00                              | 94.20                      | 174.00                         | < LOQ                               | < LOQ                      | < LOQ                          |
| 111.00                              | 76.29                      | 136.41                         | < LOQ                               | < LOQ                      | 44.55                          |
| 109.00                              | 90.99                      | 163.44                         | < LOQ                               | 6.87                       | 42.60                          |
| 32.90                               | 86.58                      | 140.31                         | < LOQ                               | 3.45                       | 40.78                          |
| 2.41                                | 58.89                      | 21.93                          | < LOQ                               | < LOQ                      | 43.99                          |
| 84.70                               | 23.70                      | 158.67                         | < LOQ                               | 6.39                       | 43.21                          |
| 98.10                               | 16.02                      | 168.06                         | < LOQ                               | < LOQ                      | 44.51                          |
| 50.80                               | 75.24                      | 141.33                         | < LOQ                               | < LOQ                      | 43.96                          |
| 44.90                               | 79.41                      | 134.55                         | < LOQ                               | < LOQ                      | 44.26                          |
| 84.10                               | 93.60                      | 166.95                         | < LOQ                               | < LOQ                      | 46.45                          |
| 57.90                               | 97.77                      | 153.66                         | < LOQ                               | < LOQ                      | 43.76                          |
| 49.10                               | 16.95                      | 105.15                         | < LOQ                               | < LOQ                      | 44.15                          |
| 60.30                               | 88.95                      | 167.07                         | < LOQ                               | 4.56                       | 47.04                          |
| 24.80                               | 64.05                      | 81.78                          | < LOQ                               | < LOQ                      | 44.38                          |
| 81.00                               | 87.54                      | 161.10                         | < LOQ                               | < LOQ                      | 42.78                          |
| 83.80                               | 95.01                      | 136.86                         | < LOQ                               | < LOQ                      | 44.54                          |
| 89.70                               | 93.81                      | 136.44                         | < LOQ                               | < LOQ                      | 48.29                          |
| 36.36                               | 97.65                      | 151.05                         | < LOQ                               | < LOQ                      | 41.92                          |
| 13.52                               | 78.60                      | 51.54                          | < LOQ                               | 13.14                      | 41.66                          |
| 46.01                               | 27.36                      | 131.04                         | < LOQ                               | < LOQ                      | 41.84                          |
| 12.85                               | 19.59                      | 56.82                          | < LOQ                               | < LOQ                      | 43.25                          |
| 132.70                              | 85.98                      | 175.26                         | < LOQ                               | 5.28                       | 41.08                          |
| 123.80                              | 97.35                      | 165.66                         | < LOQ                               | < LOQ                      | 46.29                          |
| 123.20                              | 69.60                      | 164.73                         | < LOQ                               | < LOQ                      | 42.80                          |
| 134.70                              | 85.23                      | 169.68                         | < LOQ                               | 3.18                       | 42.56                          |
| 7.33                                | 4.32                       | 46.02                          | < LOQ                               | < LOQ                      | 40.73                          |
|                                     |                            |                                | < LOQ                               | < LOQ                      | 40.29                          |
|                                     |                            |                                | < LOQ                               | < LOQ                      | 42.79                          |
|                                     |                            |                                | < LOQ                               | < LOQ                      | 47.08                          |
|                                     |                            |                                | < LOQ                               | < LOQ                      | 45.22                          |
|                                     |                            |                                | < LOQ                               | 5.28                       | 10.85                          |
|                                     |                            |                                | < LOQ                               | < LOQ                      | < LOQ                          |
|                                     |                            |                                | < LOQ                               | < LOQ                      | < LOQ                          |
|                                     |                            |                                | < LOQ                               | < LOQ                      | 4.89                           |
